# Supplementary material for: HDAC-Linked “Proliferative” miRNA Expression Pattern in Pancreatic Neuroendocrine Tumors
Source: MDPI journal article supplement (doi:10.3390/ijms19092781), 2018-09-15
Supplement: s1 [file s1]

**Supplementary Table S1.** Antibodies and conditions used for IHC.

| Antibody* | Cat.-No.              | Clone / Lot No. | Dilution / incubation |
|-----------|-----------------------|-----------------|-----------------------|
| HDAC1     | ab19845 <sup>a</sup>  | GR100389-1      | 1:2000 / ½ h          |
| HDAC2     | ab16032 <sup>a</sup>  | GR114290-1      | 1:250 / ½ h           |
| HDAC3     | sc-11417 <sup>b</sup> | H-99            | 1:100 / ½ h           |
| HDAC4     | sc-11418 <sup>b</sup> | H-92            | 1:100 / ½ h           |
| HDAC5     | ab55403 <sup>a</sup>  | GR36969-3       | 1:500 / ½ h           |
| HDAC6     | sc-11420 <sup>b</sup> | H-300           | 1:500 / ½ h           |
| HDAC8     | ab39664 <sup>a</sup>  | GR38788-6       | 1:100 / ½ h           |
| HDAC9     | ab59718 <sup>a</sup>  | GR129331-1      | 1:500 / ½ h           |
| HDAC10    | ab53096 <sup>a</sup>  | GR45168-3       | 1:200 / ½ h           |
| HDAC11    | ab18973 <sup>a</sup>  | GR107170-1      | 1:50 / ½ h            |
| Sirt1     | sc-15404 <sup>b</sup> | H-300           | 1:100 / ½ h           |

\* Species: rabbit; Pretreatment: heat-induced epitope retrieval in pH = 9 antigen retrieval buffer (Dako, Glostrup, Denmark) and waterbath; Purchased from <sup>a</sup> abcam (Cambridge, UK) <sup>b</sup> Santa Cruz Biotechnology (Dallas, Texas)

**Supplementary Table S2.** Correlation Analysis of miRNA and HDAC expression.

|           |                                   | HDAC1_PNET_ncl_Score | HDAC2_PNET_ncl_Score | HDAC3_PNET_ncl_Score | HDAC4_PNET_ncl_Score | HDAC5_PNET_ncl_Score | HDAC6_PNET_ncl_Score | HDAC8_PNET_ncl_Score | HDAC9_PNET_ncl_Score | HDAC10_PNET_ncl_Score | HDAC11_PNET_ncl_Score | SIRT1_PNET_ncl_Score |        |        |        |        |
|-----------|-----------------------------------|----------------------|----------------------|----------------------|----------------------|----------------------|----------------------|----------------------|----------------------|-----------------------|-----------------------|----------------------|--------|--------|--------|--------|
| miR132_3p | Pearson's correlation coefficient | -0.194               | -0.219               | -0.078               | -0.150               | -0.196               | 0.006                | -0.071               | -0.152               | -0.096                | -0.054                | -0.013               | -0.081 | -0.054 | 0.024  | -0.115 |
|           | Sig. (two-sided)                  | 0.181                | 0.127                | 0.600                | 0.314                | 0.186                | 0.968                | 0.633                | 0.292                | 0.523                 | 0.703                 | 0.929                | 0.591  | 0.722  | 0.871  | 0.435  |
| miR145_5p | Pearson's correlation coefficient | 0.256                | 0.126                | 0.033                | -0.046               | 0.047                | -0.003               | 0.056                | -0.062               | 0.033                 | 0.004                 | 0.019                | 0.088  | 0.062  | -0.041 | -0.091 |
|           | Sig. (two-sided)                  | 0.076                | 0.384                | 0.826                | 0.760                | 0.752                | 0.981                | 0.704                | 0.670                | 0.826                 | 0.979                 | 0.893                | 0.559  | 0.681  | 0.783  | 0.536  |
| miR183_5p | Pearson's correlation coefficient | -0.113               | -0.092               | -0.153               | -0.196               | -0.208               | -0.102               | -0.072               | -0.195               | -0.008                | -0.036                | -0.091               | 0.108  | 0.143  | -0.129 | -0.206 |
|           | Sig. (two-sided)                  | 0.438                | 0.526                | 0.298                | 0.187                | 0.160                | 0.491                | 0.627                | 0.174                | 0.958                 | 0.802                 | 0.522                | 0.186  | 0.341  | 0.383  | 0.160  |
| miR34a_5p | Pearson's correlation coefficient | -0.125               | -0.086               | 0.194                | 0.012                | 0.152                | -0.002               | 0.010                | 0.006                | 0.152                 | -0.003                | 0.088                | 0.083  | 0.060  | -0.038 | -0.003 |
|           | Sig. (two-sided)                  | 0.393                | 0.554                | 0.186                | 0.936                | 0.308                | 0.987                | 0.947                | 0.966                | 0.309                 | 0.985                 | 0.535                | 0.582  | 0.692  | 0.796  | 0.982  |
| miR449a   | Pearson's correlation coefficient | 0.237                | 0.192                | 0.310                | 0.302                | 0.245                | -0.179               | 0.154                | 0.042                | 0.045                 | 0.001                 | -0.008               | -0.042 | -0.099 | 0.107  | 0.176  |
|           | Sig. (two-sided)                  | 0.101                | 0.182                | 0.032                | 0.039                | 0.097                | 0.224                | 0.294                | 0.771                | 0.765                 | 0.995                 | 0.955                | 0.782  | 0.513  | 0.469  | 0.231  |

Pearson correlation analysis of miRNA expression data and HDAC expression data. Shown are the correlation coefficients and the *p*-values. \* *p* < 0.05, \*\* *p* < 0.01.

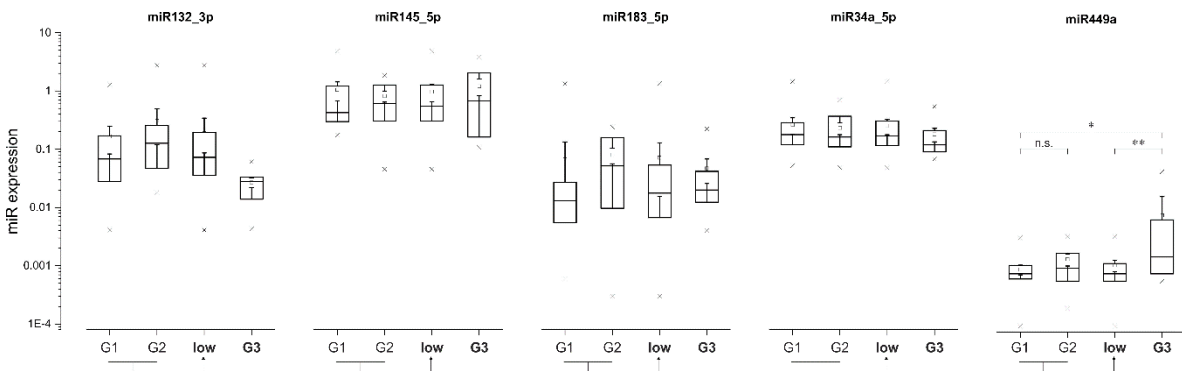

**Supplementary Figure S1.** Quantitative analysis of pNET-miRNA expression versus grading. The semi-quantitative miRNA expression scores are plotted via box plots versus grading of pNET cases. Additionally, the expression levels were summarized for G1 and G2 pNET cases. \* *p* < 0.05, \*\* *p* < 0.01 (t-Test and ANOVA). According to statistical analysis there are only significant group differences related grading and miRNA449a.

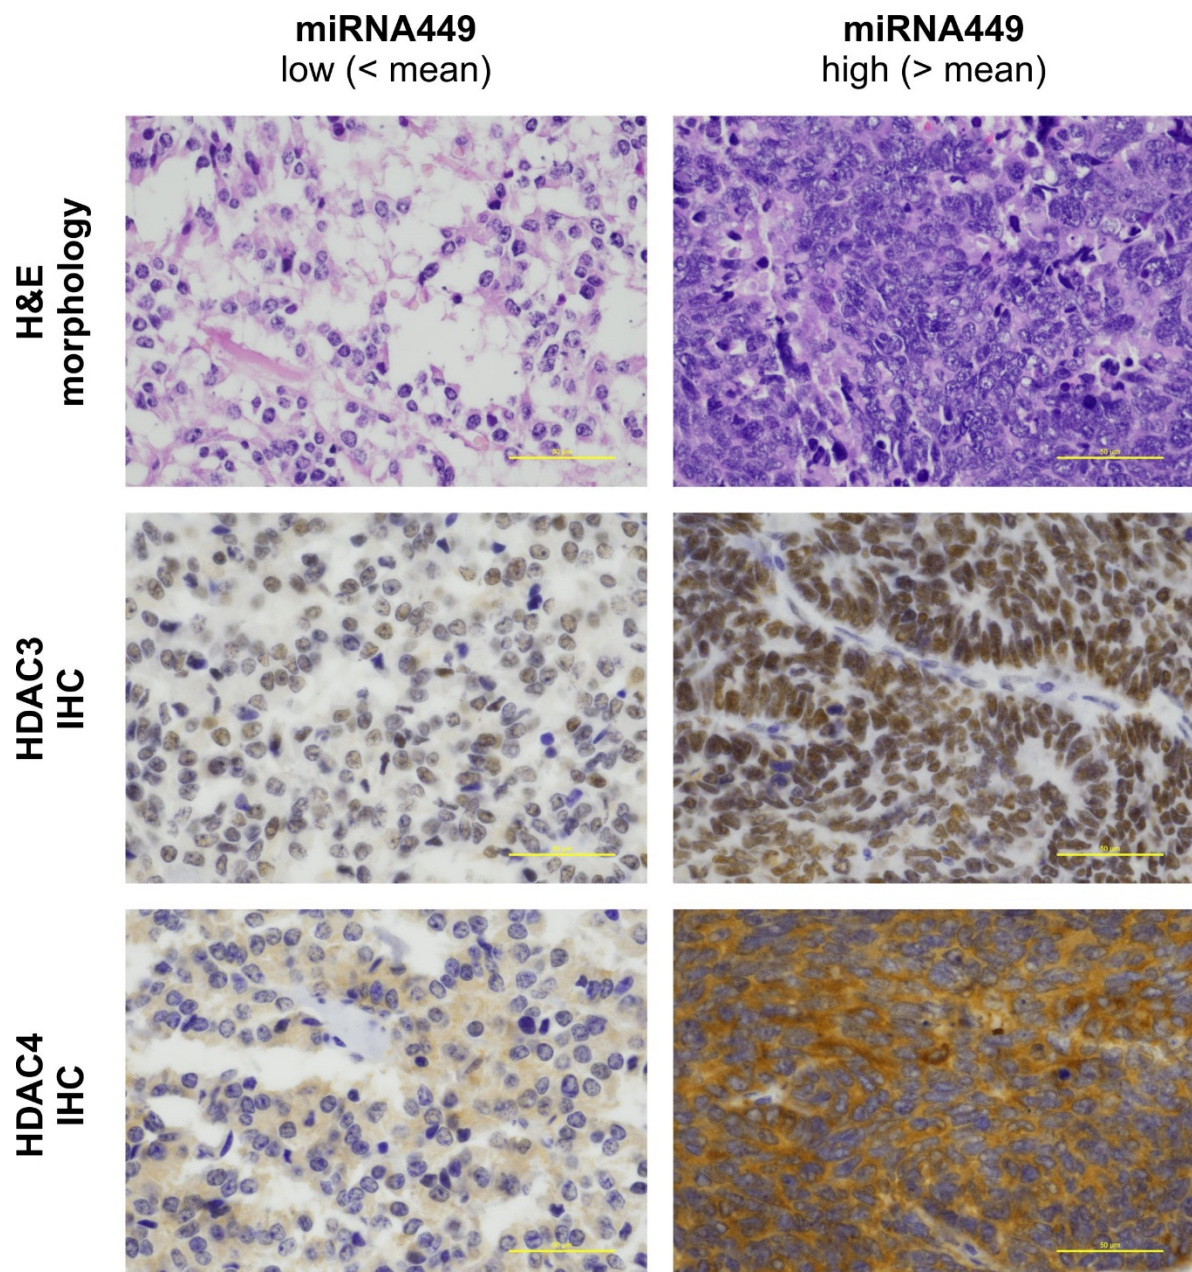

**Supplementary Figure S2.** Histomorphology and HDAC3/4 Immunohistochemical staining. Representative images of H&E morphology (top row) and HDAC3 (second row) and HDAC4 (third row) immunohistochemistry staining for pNET cases with significant differences in HDAC expression related to miRNA449a expression levels (low/high). Scale bar (yellow) indicates 50 $\mu$ m at 400x magnification. Abbreviations: HDAC, histone deacetylase; H&E, hematoxylin & eosin; IHC, immunohistochemistry; pNET, pancreatic neuroendocrine tumor.
